# Supplementary material for: Rhizobium etli asparaginase II: An alternative for acute lymphoblastic leukemia (ALL) treatment
Source: PubMed Central journal article supplement — Bioengineered. 2013 Jan 1;4(1):30–6. doi: 10.4161/bioe.21710 (PMC3566018; doi:10.4161/bioe.21710), 2013-01-01
Supplement: bbug-4-30-s01.pdf [file bbug-4-30-s01.pdf]

## **Supplemental Material to:**

**Alejandro Huerta-Saquero, Zahaed Evangelista-Martínez,  
Angélica Moreno-Enriquez and Ernesto Perez-Rueda**

***Rhizobium etli* asparaginase II: An alternative for acute  
lymphoblastic leukemia (ALL) treatment**

**Bioengineered Bugs 2013; 4(1)**

**<http://dx.doi.org/10.4161/bioe.21710>**

**<http://www.landesbioscience.com/journals/bioe/article/21710/>**

Suppl. Fig. 1.

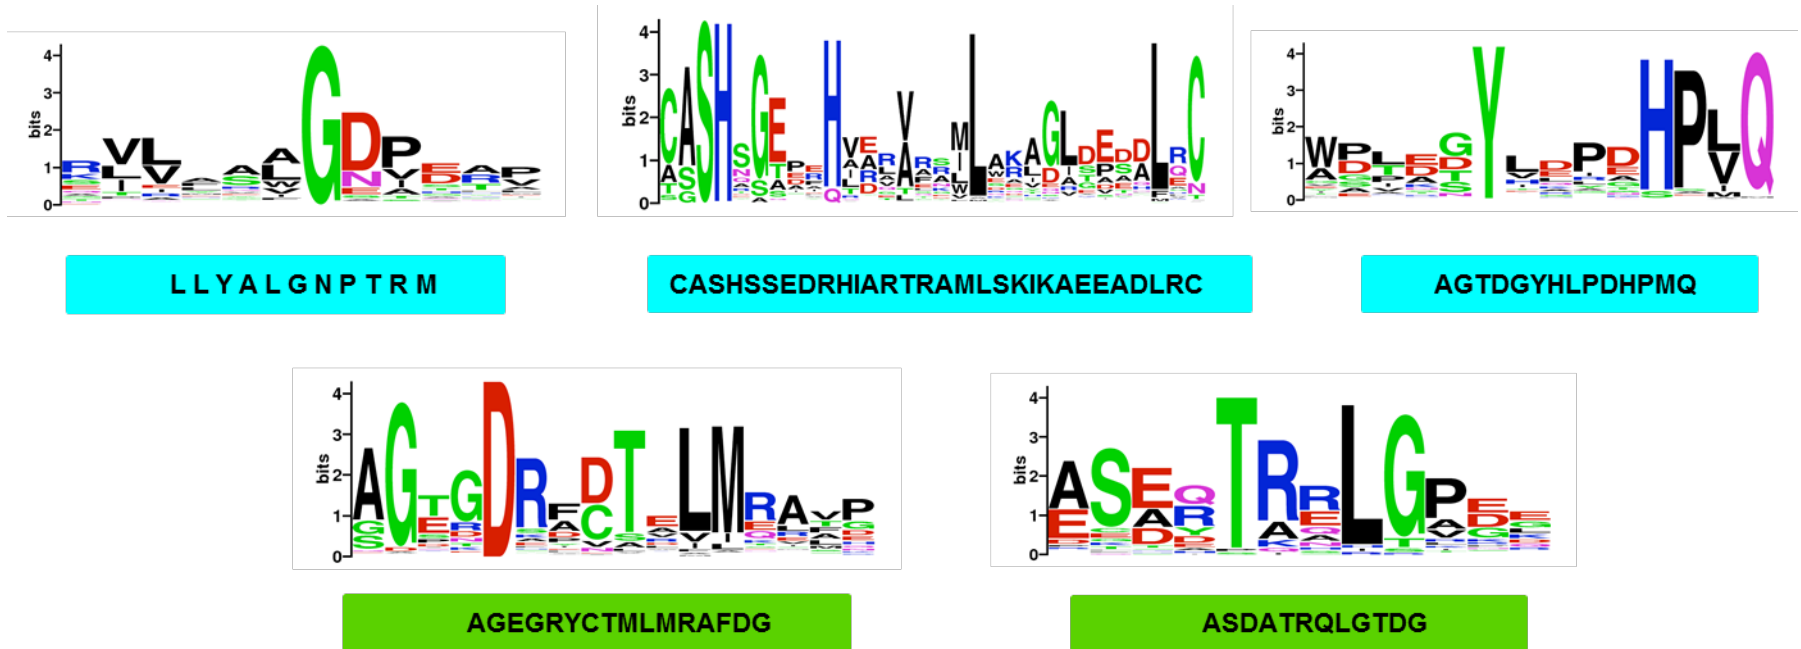

Immuno-Logo from Rhizobial-type asparaginases. Epitope sequences with an Immuno score from 0.7 to 0.79 (shown in cyan) and immuno score  $\geq 0.8$  (shown in green).
